# Supplementary material
Source: publisher figshare collection journal article supplement (https://acs.figshare.com/ndownloader/files/39662153)
Supplement: Supplementary file 1 [file 39662153]

## Supporting Information

### Residual Molecular Groups Adsorption in Tuning the Transport

#### Properties of Carbon Nanotubes

Xiaoling Li<sup>a</sup>, Juexian Cao<sup>\*a</sup>, Yanning Zhang<sup>\*a,b</sup>

*a: Hunan Institute of Advanced Sensing and Information Technology, Xiangtan University, Xiangtan 411105, PR China*

*b: Institute of Fundamental and Frontier Sciences, University of Electronic Science and Technology of China, Chengdu 610054, China*

**\*Corresponding Authors:** [jxcao@xtu.edu.cn](mailto:jxcao@xtu.edu.cn); [yanningz@uestc.edu.cn](mailto:yanningz@uestc.edu.cn)

## Supplementary Figures

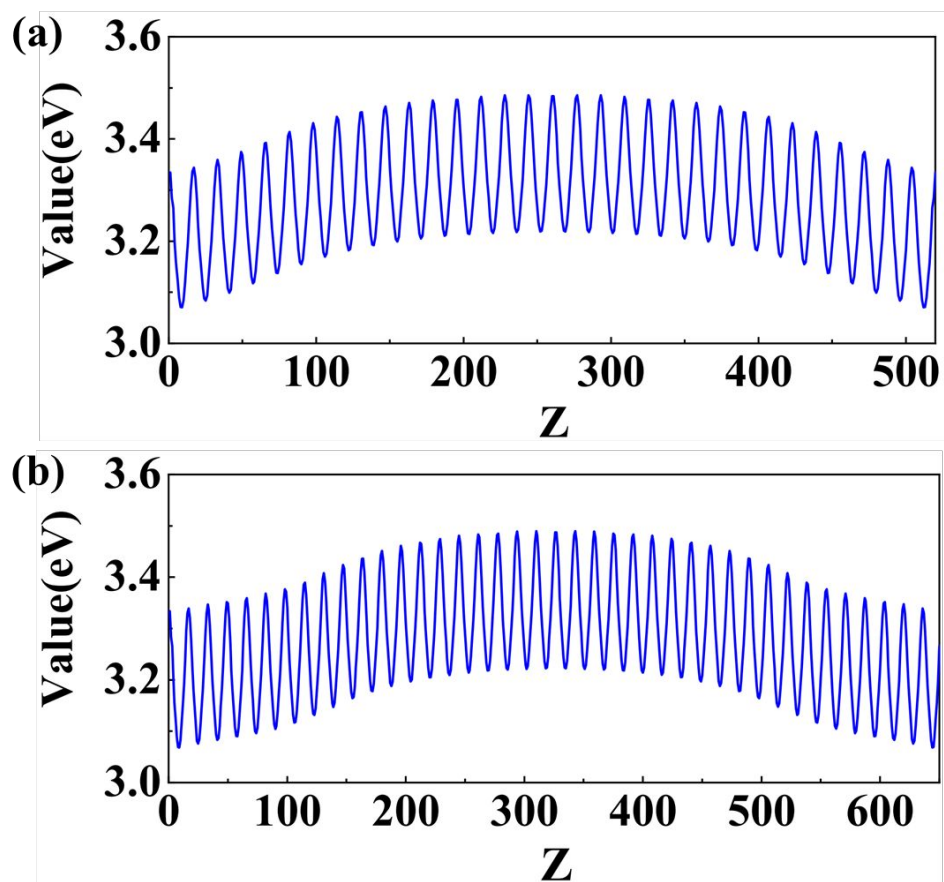

Fig.S1. Buffer layer test: (a) 1 unit cell and (b) 4 unit cells.

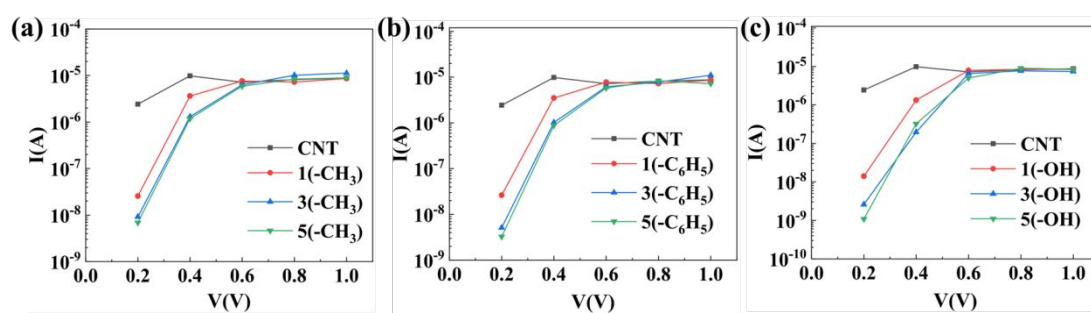

Fig.S2. I-V curves of (a) CNT-nCH<sub>3</sub> (b) CNT-nC<sub>6</sub>H<sub>5</sub> (c) CNT-nOH devices.

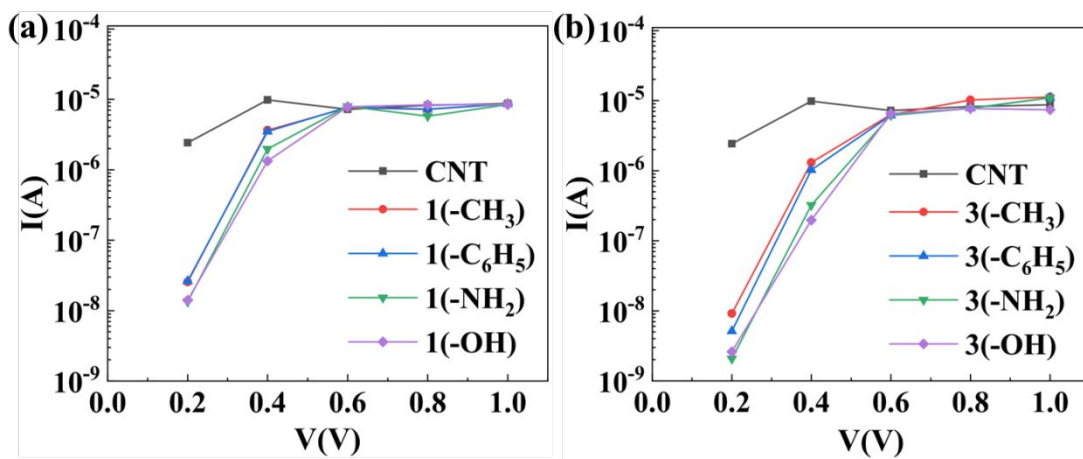

Fig.S3. I-V curve of (a) CNT-1R and (b) CNT-3R devices.

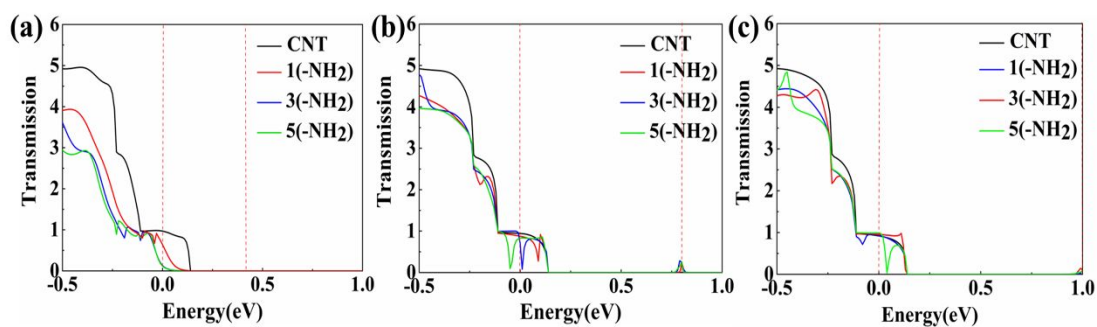

Fig.S4. Transmission spectra of CNT and CNT-nNH<sub>2</sub> in (a) 0.4V, (b) 0.8V, and (c) 1.0V bias window, respectively.

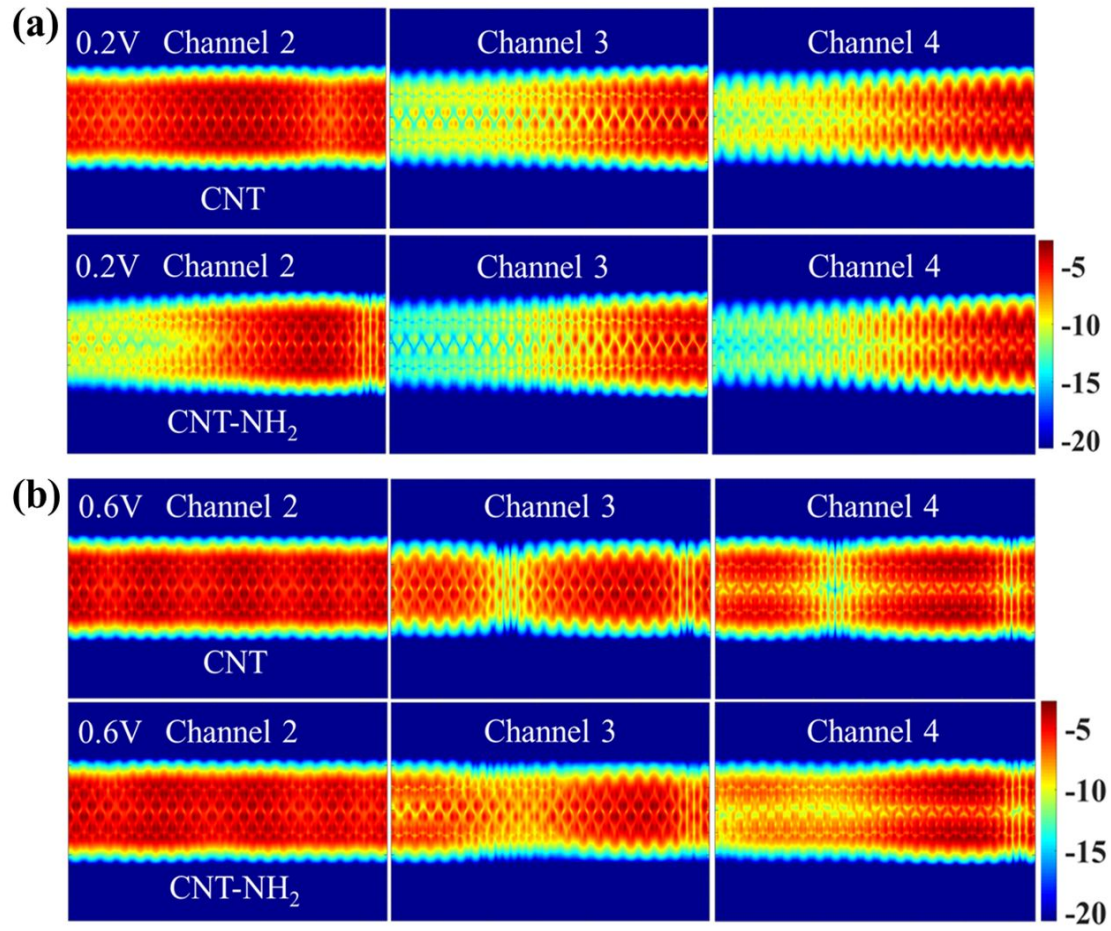

Fig.S5. Scattering states in different transmission channels of pure CNT and CNT-NH<sub>2</sub> at Fermi level under (a) 0.2 V and (b) 0.6V bias voltages.
